# Supplementary material
Source: PubMed Central journal article supplement (PMC4492713)
Supplement: NIHMS4788-supplement-Suppl__Data.pdf [file NIHMS4788-supplement-Suppl__Data.pdf]

Supplementary Table ?? : Weights assigned to each feature or feature combination both standardized to have mean 0 and standard deviation 1.

| Features                                                | Weights  |
|---------------------------------------------------------|----------|
| Mascot score                                            | 0.31062  |
| Mascot score * Mascot score                             | 0.05620  |
| Mascot score * Best peptide Mascot score                | -0.25288 |
| Mascot score * Number of baits per prey                 | 0.03587  |
| Mascot score * Bidirectionality                         | -0.24263 |
| Best peptide Mascot score                               | 1.09992  |
| Best peptide Mascot score * Best peptide Mascot score   | -0.27573 |
| Best peptide Mascot score * Number of baits per prey    | -0.69297 |
| Best peptide Mascot score * Bidirectionality            | 0.47462  |
| Number of baits per prey                                | 0.30352  |
| Number of baits per prey * Number of baits per prey     | 0.29595  |
| Number of baits per prey * Bidirectionality             | 0.00940  |
| Bidirectionality                                        | -0.47109 |
| Number of common neighbors                              | 0.46256  |
| Number of common neighbors * Number of common neighbors | -0.56351 |
| Number of common neighbors * Mascot Score               | 0.17698  |
| Number of common neighbors * Best peptide Mascot score  | 0.24390  |
| Number of common neighbors * Number of baits per prey   | -0.24248 |
| Number of common neighbors * Bidirectionality           | 0.31828  |
| Constant offset                                         | -2.73687 |
